# Supplementary material for: A Novel Method for Recognizing Vietnamese Voice Commands on Smartphones with Support Vector Machine and Convolutional Neural Networks
Source: Hindawi journal article supplement (doi:10.1155/2020/2312908), 2020-03-01
Supplement: f1 [file 2312908.f1.csv]

#id	Vietnamese	English
1	gọi điện thoại	Make a call
2	soạn tin nhắn	Make a message
3	thêm danh bạ	Add contacts
4	tôi muốn gửi thư	I want to send mail
5	tôi muốn hẹn giờ	Alarm appointment
6	chỉ đường	Find the directions
7	mở ứng dụng	Open the application
9	tìm kiếm	Search
8	dự báo thời tiết	weather forecasts
10	tăng âm lượng	Volume Up
11	giảm âm lượng	Volume Down
12	bật wifi	Turn on wifi
13	tắt wifi	Turn off wifi
14	bật dữ liệu mạng	Turn on network data
15	tắt dữ liệu mạng	Turn off network data
16	bật bluetooth	Turn on Bluetooth
17	tắt bluetooth	Turn off Bluetooth
18	chế độ màn hình sáng	Bright screen
19	chế độ màn hình tối	Dark screen
20	bật đồng bộ dữ liệu	Turn on data synchronization
21	tắt đồng bộ dữ liệu	Turn off data synchronization
22	mở bài hát	Open the song
